# Supplementary material for: Maternal deprivation induces alterations in cognitive and cortical function in adulthood
Source: PubMed Central journal article supplement (PMC5913289; doi:10.1038/s41398-018-0119-5), 2018-03-27
Supplement: 41398_2018_119_MOESM3_ESM.pdf [file 41398_2018_119_MOESM3_ESM.pdf]

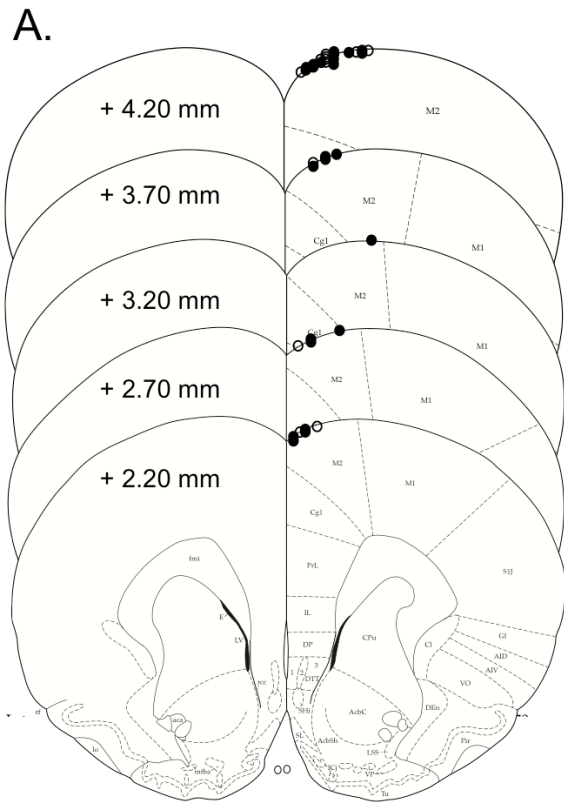

**PFC**

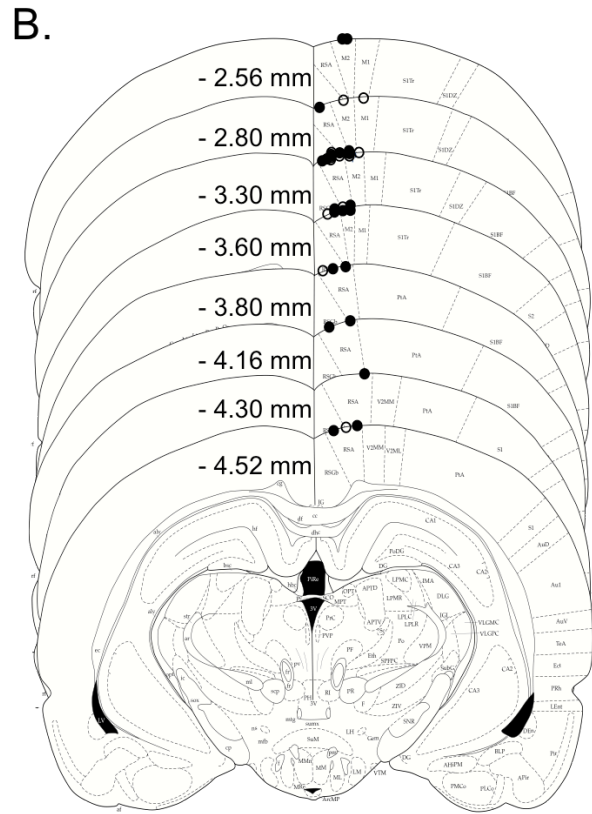

**Vertex**

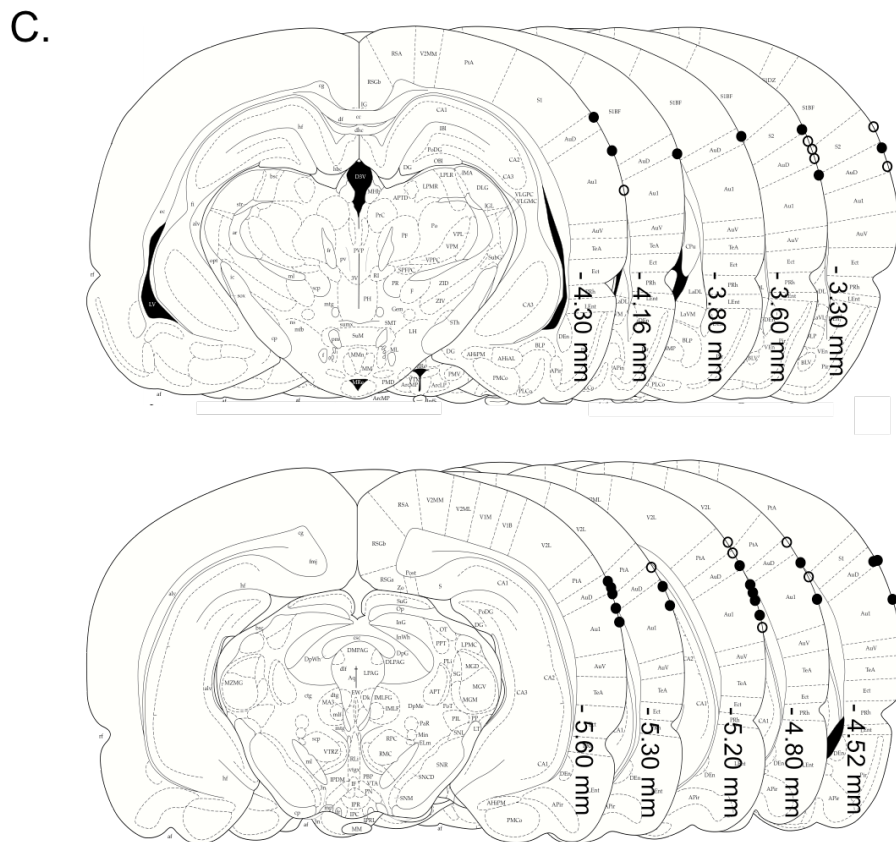

**TC**
